# Supplementary material for: Metabolomic Profiling and Cytotoxic Tetrahydrofurofuran Lignans Investigations from Premna odorata Blanco
Source: PubMed Central journal article supplement (PMC6836009; doi:10.3390/metabo9100223), 2019-10-13
Supplement: metabolites-09-00223-s001.pdf [file metabolites-09-00223-s001.pdf]

## Supplementary Information

### Table of Contents

| <b>Figure legends</b>                                                                                     | <b>Page No.</b> |
|-----------------------------------------------------------------------------------------------------------|-----------------|
| <b>Figure S1.</b> $^1\text{H}$ NMR spectrum of compound <b>35</b> measured in $\text{CDCl}_3$ at 400 MHz. | <b>S5</b>       |
| <b>Figure S2.</b> DEPT-Q NMR spectrum of compound <b>35</b> measured in $\text{CDCl}_3$ at 100 MHz.       | <b>S6</b>       |
| <b>Figure S3.</b> HSQC spectrum of compound <b>35</b> measured in $\text{CDCl}_3$ .                       | <b>S7</b>       |
| <b>Figure S4.</b> HMBC spectrum of compound <b>35</b> measured in $\text{CDCl}_3$ .                       | <b>S8</b>       |
| <b>Figure S5.</b> HRESIMS spectrum of compound <b>35</b> .                                                | <b>S9</b>       |

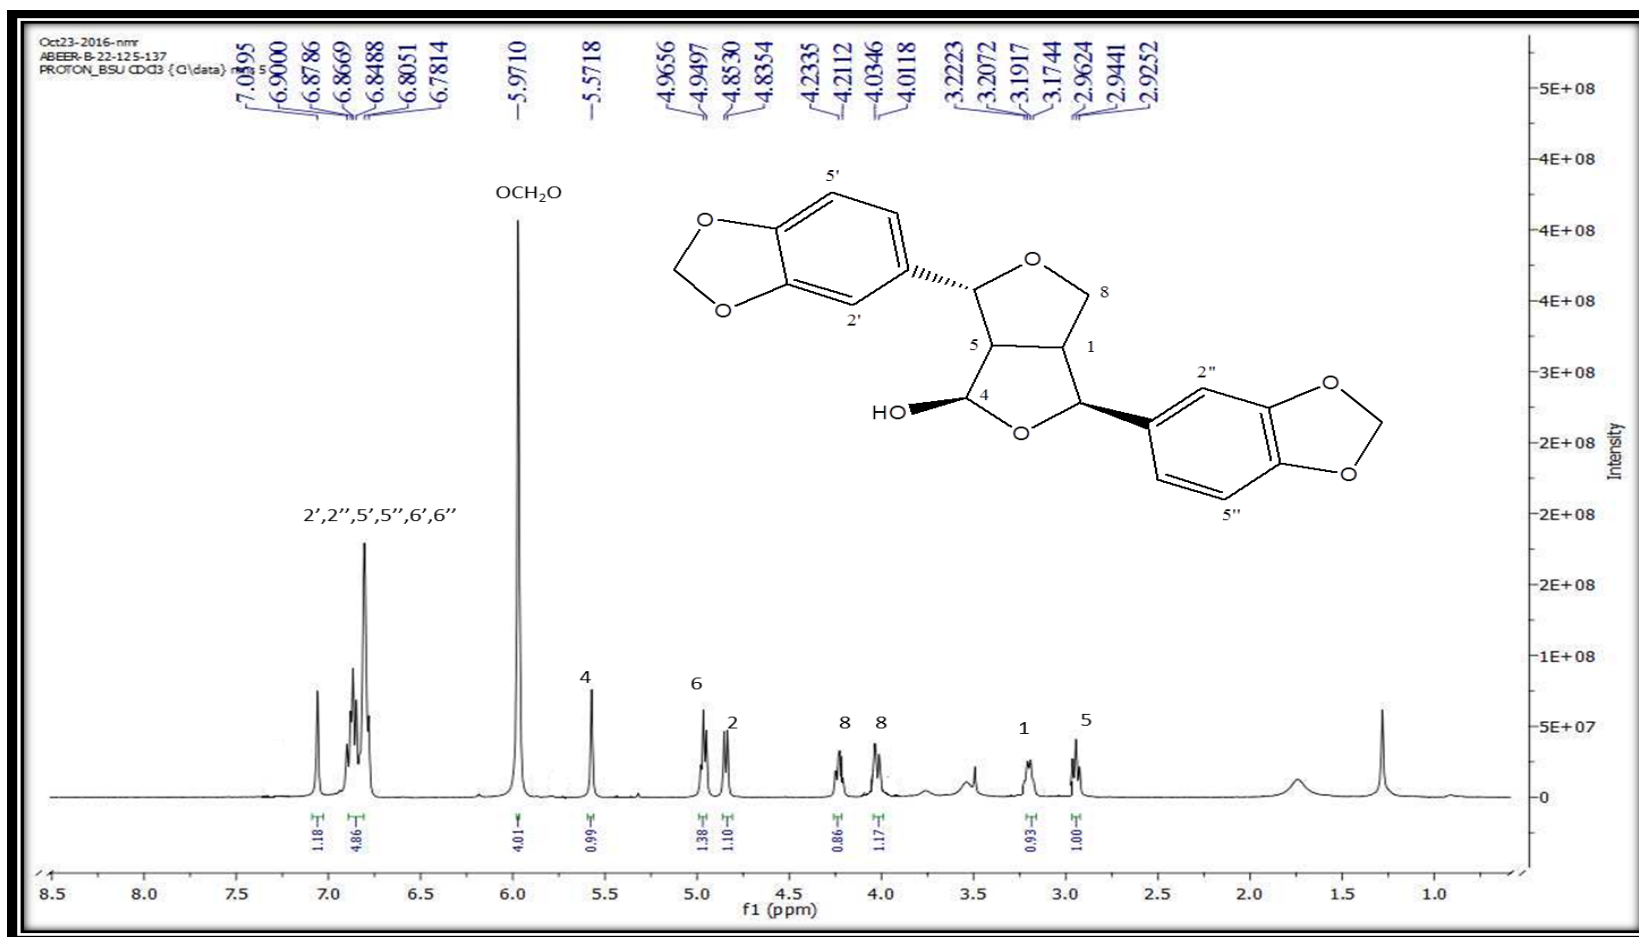

**Figure S1.** <sup>1</sup>H NMR spectrum of compound **35** measured in CDCl<sub>3</sub> at 400 MHz.

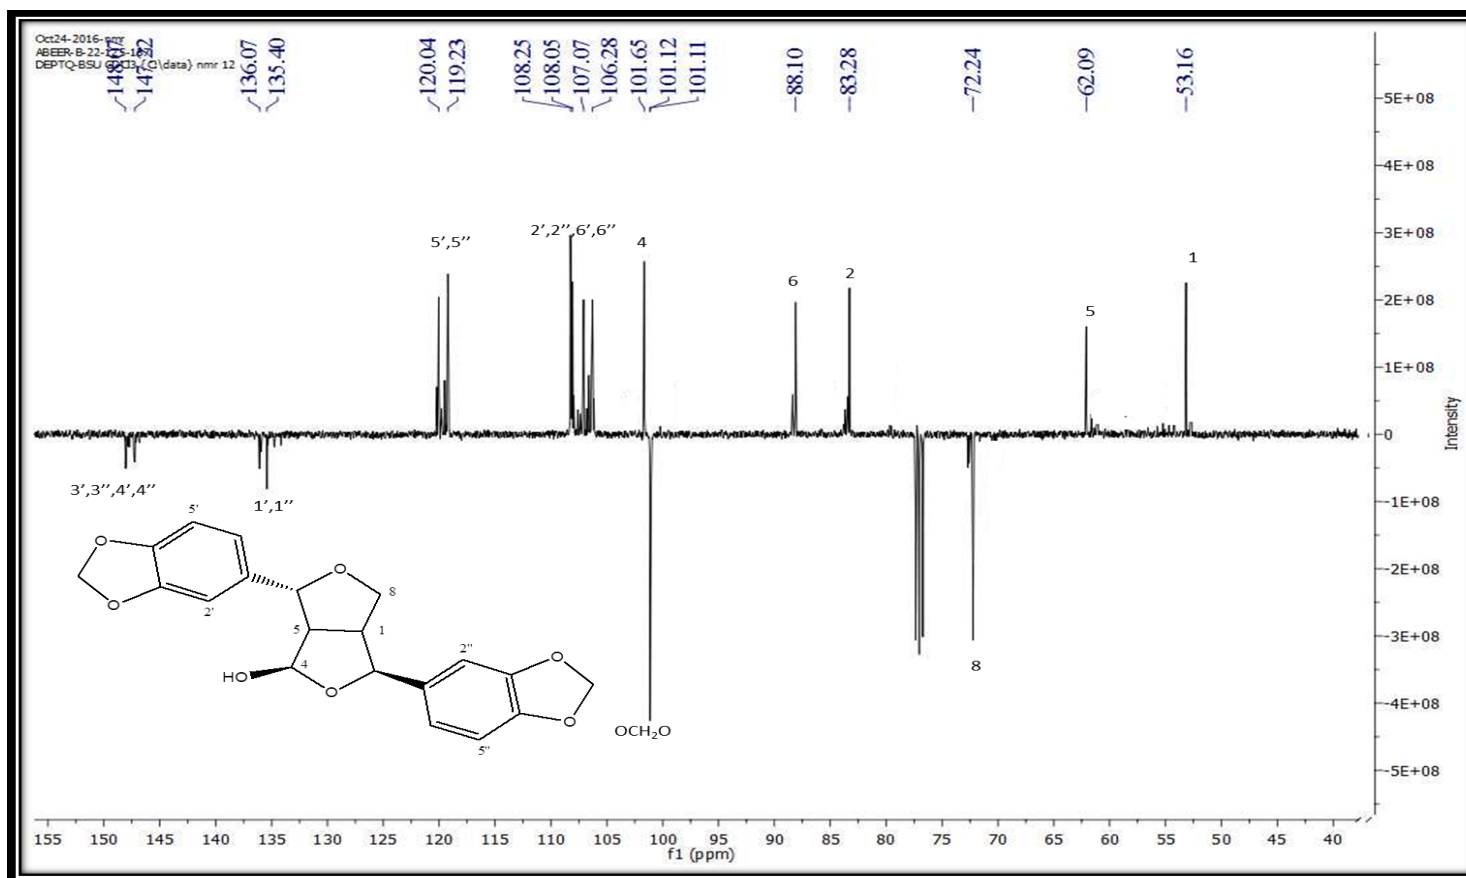

**Figure S2.** DEPT-Q NMR spectrum of compound **35** measured in CDCl<sub>3</sub> at 100 MHz.

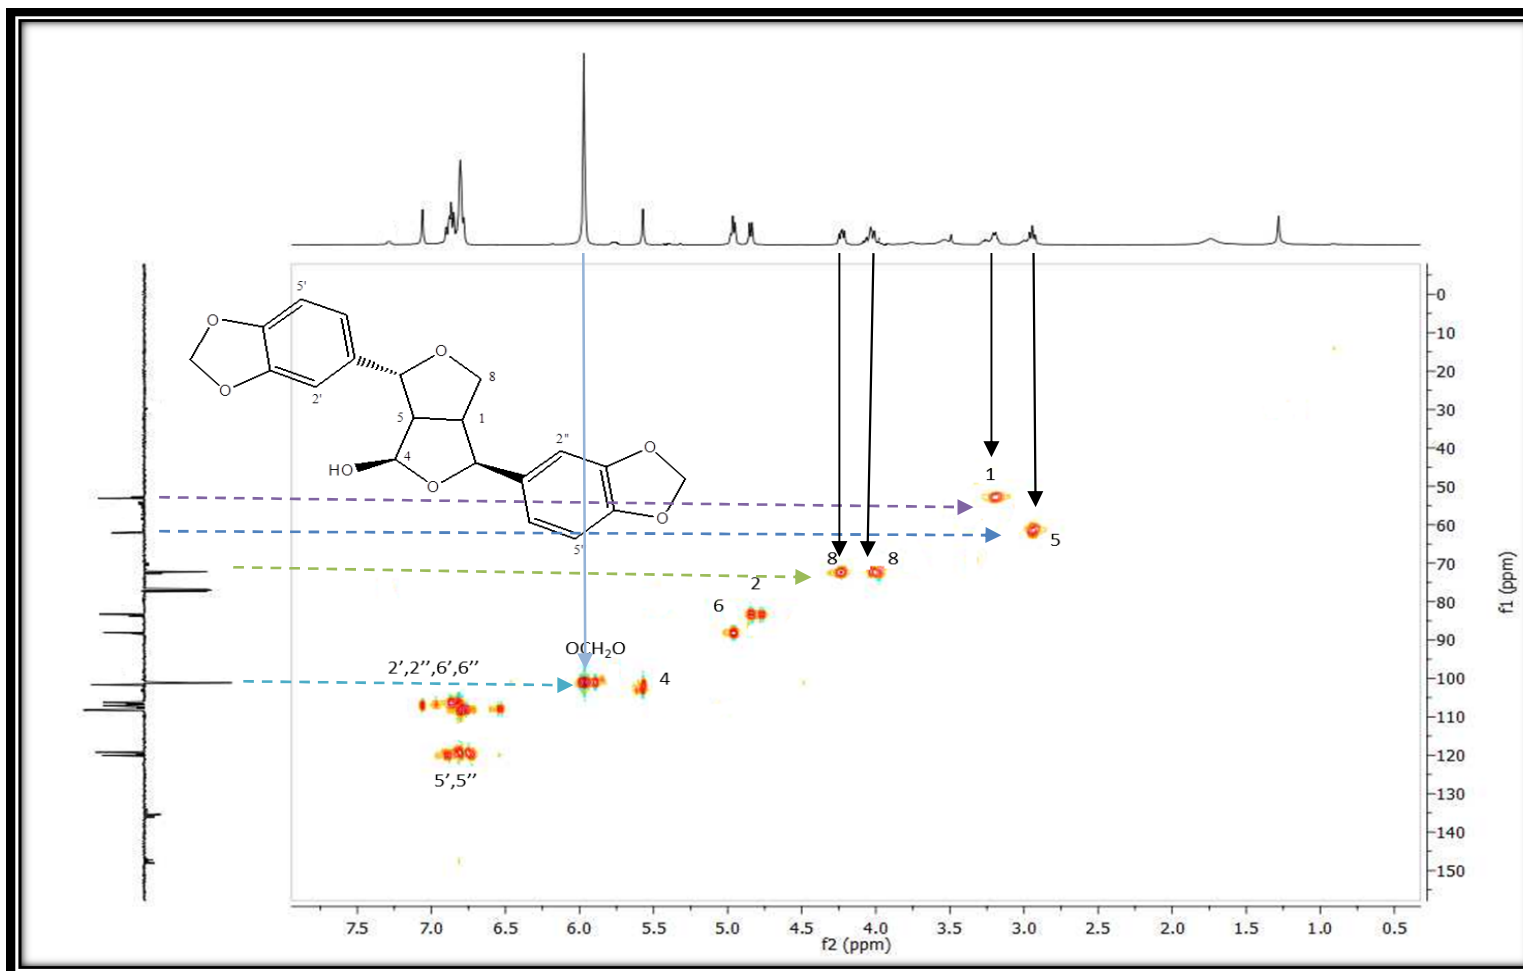

**Figure S3.** HSQC spectrum of compound **35** measured in  $\text{CDCl}_3$

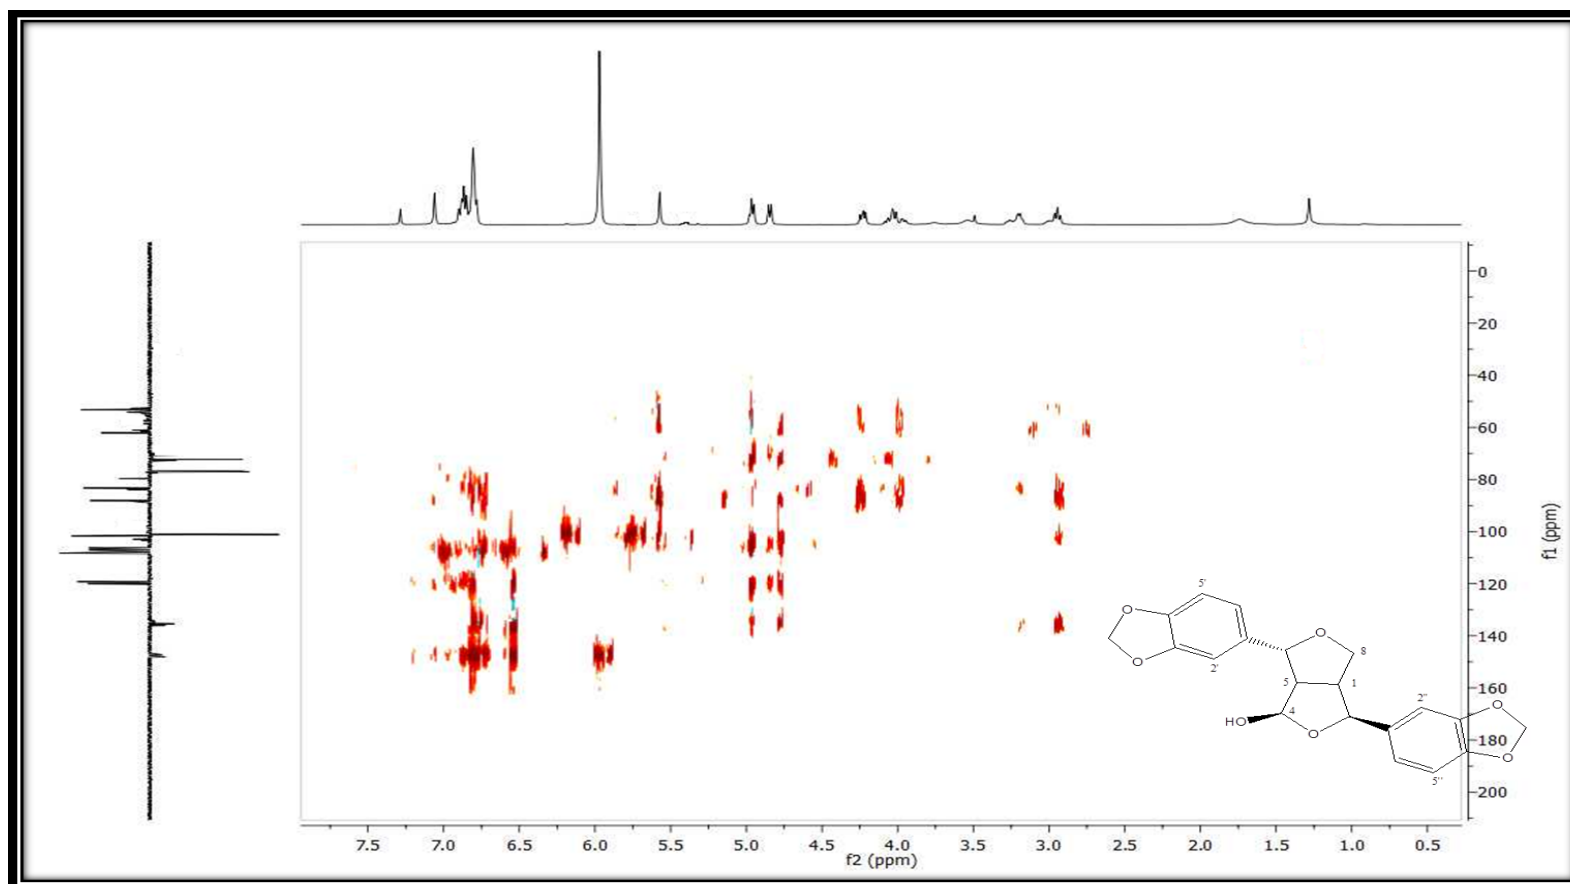

**Figure S4.** HMBC spectrum of compound **35** measured in CDCl<sub>3</sub>

MR159\_PO14 #1093 RT: 15.92 AV: 1 NL: 1.86E6  
F: FTMS + p ESIFull.ms [150.00-2000.00]

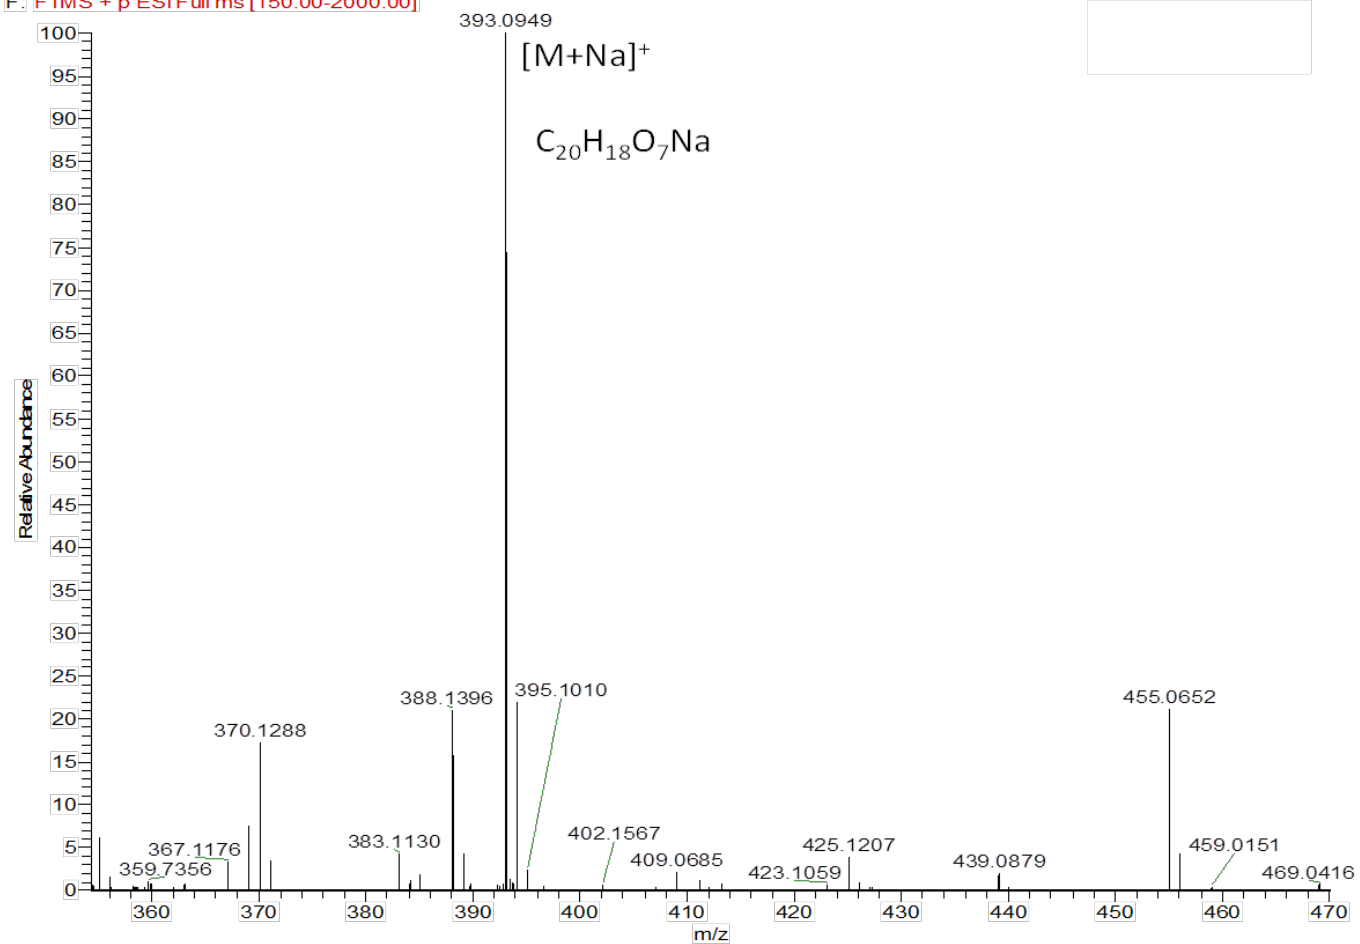

Figure S5. HRESIMS spectrum of compound 35.
